# Supplementary material
Source: Research Square preprint supplement (doi:10.21203/rs.3.rs-9922280/v1)
Supplement: Supplementary file 1 [file 457a506b52b3de8ccfa23bbc.docx]

**Supplementary Table 1**: *Baseline characteristics of pregnant women by maternal HIV status, Western Kenya PRISMA cohort, 2022–2026 after Propensity Score Matching*

| **Characteristic** | **HIV Status** | | **Overall** |
| --- | --- | --- | --- |
| **Negative**, N = 1087 (78.0%) | **Positive**, N = 307 (22.0%) | **N = 1,394** |
| Maternal age, Median (IQR) | 27 (7.8) | 30 (9.0) | 28 (8.2) |
| Maternal age, n (%) |  |  |  |
| <20 years | 42 (79.2%) | 11 (20.8%) | 53 (3.8%) |
| 20-34 years | 907 (79.6%) | 232 (20.4%) | 1,139 (81.7%) |
| 35+ years | 138 (68.3%) | 64 (31.7%) | 202 (14.5%) |
| Residence, n (%) |  |  |  |
| Peri-urban Manyata | 572 (77.9%) | 162 (22.1%) | 734 (52.7%) |
| Rural-Karemo | 515 (78.0%) | 145 (22.0%) | 660 (47.3%) |
| SES quintile, n (%) |  |  |  |
| Lowest SES | 120 (79.5%) | 31 (20.5%) | 151 (10.8%) |
| Low SES | 161 (79.7%) | 41 (20.3%) | 202 (14.5%) |
| Middle SES | 244 (76.5%) | 75 (23.5%) | 319 (22.9%) |
| High SES | 272 (77.5%) | 79 (22.5%) | 351 (25.2%) |
| Highest SES | 290 (78.2%) | 81 (21.8%) | 371 (26.6%) |
| Marital status, n (%) |  |  |  |
| Married | 964 (79.1%) | 255 (20.9%) | 1,219 (87.4%) |
| Single/divorsed/widowed | 123 (70.3%) | 52 (29.7%) | 175 (12.6%) |
| Education level, n (%) |  |  |  |
| Tertiary | 159 (78.7%) | 43 (21.3%) | 202 (14.5%) |
| Secondary | 468 (79.3%) | 122 (20.7%) | 590 (42.3%) |
| Primary | 457 (76.9%) | 137 (23.1%) | 594 (42.6%) |
| None | 3 (37.5%) | 5 (62.5%) | 8 (0.6%) |
| Job type, n (%) |  |  |  |
| Formal Employment | 63 (75.0%) | 21 (25.0%) | 84 (6.0%) |
| Informal Employment | 518 (77.7%) | 149 (22.3%) | 667 (47.8%) |
| House wife | 240 (77.7%) | 69 (22.3%) | 309 (22.2%) |
| Not working | 266 (79.6%) | 68 (20.4%) | 334 (24.0%) |
| Gravida, n (%) |  |  |  |
| Primigravida | 112 (79.4%) | 29 (20.6%) | 141 (10.1%) |
| Multiparous | 747 (78.8%) | 201 (21.2%) | 948 (68.0%) |
| Grand multiparous | 228 (74.8%) | 77 (25.2%) | 305 (21.9%) |
| MUAC @ enrolment, n (%) |  |  |  |
| Low: <23cm | 51 (81.0%) | 12 (19.0%) | 63 (4.5%) |
| Normal:23-32cm | 866 (77.7%) | 249 (22.3%) | 1,115 (80.0%) |
| High:>=33cm | 170 (78.7%) | 46 (21.3%) | 216 (15.5%) |
| 'Syphilis serostatus @ enrollment, n (%) |  |  |  |
| Negative | 1,077 (78.1%) | 302 (21.9%) | 1,379 (98.9%) |
| Positive | 10 (66.7%) | 5 (33.3%) | 15 (1.1%) |
| Malaria infection @ enrollment, n (%) |  |  |  |
| Negative | 967 (77.9%) | 274 (22.1%) | 1,241 (89.0%) |
| Positive | 120 (78.4%) | 33 (21.6%) | 153 (11.0%) |
| ***Overall*** *proportion is calculated column-wise, to describe the population. All these characteristics are at enrollment* | | | |
| **Abbreviations:** *HIV: human immunodeficiency virus; SES: socioeconomic status quintile derived from a composite household wealth index. Quintiles were defined within the study sample, with Lowest representing the poorest 20% and Highest representing the wealthiest 20% of participants.; MUAC: mid-upper arm circumference; ANC: antenatal care; IQR, interquartile range; N (%), number (percentage).* | | | |
